# Supplementary material
Source: PubMed Central journal article supplement (PMC7145278)
Supplement: ac9b05124_si_001.pdf [file ac9b05124_si_001.pdf]

# Comprehensive LESA mass spectrometry imaging of intact proteins by integration of cylindrical FAIMS

Rian L. Griffiths<sup>1#‡</sup>, James W. Hughes<sup>1,2‡</sup>, Susan E. Abbatiello<sup>3§</sup>, Michael W. Belford<sup>4</sup>, Iain B. Styles<sup>5</sup>, and Helen J. Cooper<sup>1\*</sup>

1. School of Biosciences, University of Birmingham, Edgbaston, Birmingham B15 2TT, UK.
2. EPSRC Centre for Doctoral Training in Physical Sciences for Health, University of Birmingham, Birmingham B15 2TT, UK
3. Thermo Fisher Scientific, Memorial Drive, Cambridge, MA 02139, U.S.A.
4. Thermo Fisher Scientific, River Oaks Parkway, San Jose, CA 95134, U.S.A.
5. School of Computer Sciences, University of Birmingham, Birmingham B15 2TT, UK.

# Current address: School of Pharmacy, University of Nottingham, Nottingham NG7 2RD, UK

§ Current address: The Barnett Institute, Northeastern University, Huntington Avenue, Boston, MA 02115, U.S.A.

‡ These authors contributed equally.

\* To whom correspondence should be addressed: [h.j.cooper@bham.ac.uk](mailto:h.j.cooper@bham.ac.uk)

## Supporting information

**File S1.** Protein masses detected in testes imaging dataset.

**File S2.** Protein masses detected in kidney imaging dataset.

**File S3.** Protein masses detected in brain imaging dataset.

**Figure S1.** Schematic showing the workflow for tissue analysis via liquid extraction surface analysis coupled to cylindrical FAIMS mass spectrometry imaging.

**Figure S2.** UpSet plot showing set intersections of the filtered Xtract results for intact proteins across the testes image and all compensation field values.

**Figure S3.** UpSet plot showing set intersections of the filtered Xtract results for intact proteins across the kidney image and all compensation field values.

**Figure S4.** UpSet plot showing set intersections of the filtered Xtract results for intact proteins across the brain image and all compensation field values.

**Figure S5.** LESA FAIMS EThCD MS/MS of ions with m/z 661 (14+, 9242.00 Da) detected in kidney (CV = -50 V).

**Figure S6.** LESA FAIMS EThCD MS/MS of ions detected in testes: A) m/z 706 (7+, 4933.53 Da) (CV = -70 V); B) m/z 558 (5+, 2788.48 Da) (CV = -70 V); C) m/z 1036 (20+, 20698.49 Da) (CV = -30 V).

**Table S1.** Fragment ion assignments for high mobility group nucleosomal binding domain 2 (precursor m/z 661; 14+)

**Table S2.** Fragment ion assignments for  $\beta$ -thymosin 10 (precursor m/z 706; 7+)

**Table S3.** Fragment ion assignments for N-terminal region peptide of serum albumin (precursor m/z 558; 5+)

**Table S4.** Fragment ion assignments for phosphatidyl-ethanolamine binding protein (precursor m/z 1036; 20+)

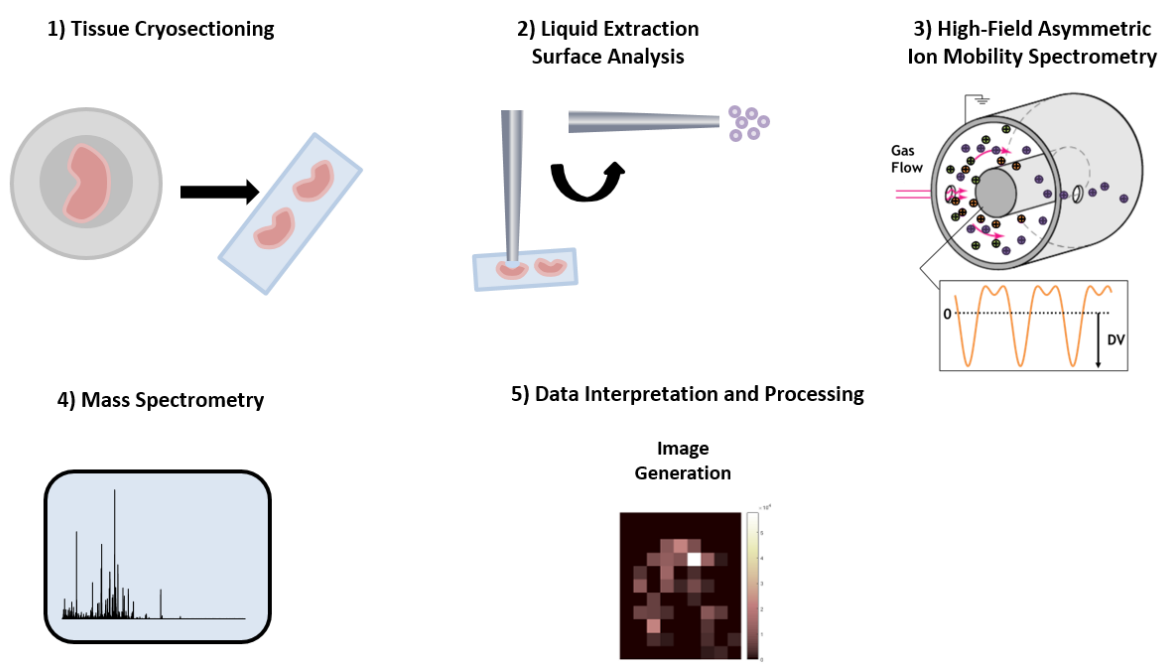

**Figure S1.** Schematic showing the workflow for tissue analysis via liquid extraction surface analysis coupled to cylindrical FAIMS mass spectrometry imaging.

Figure S2 – UpSet plot for testes

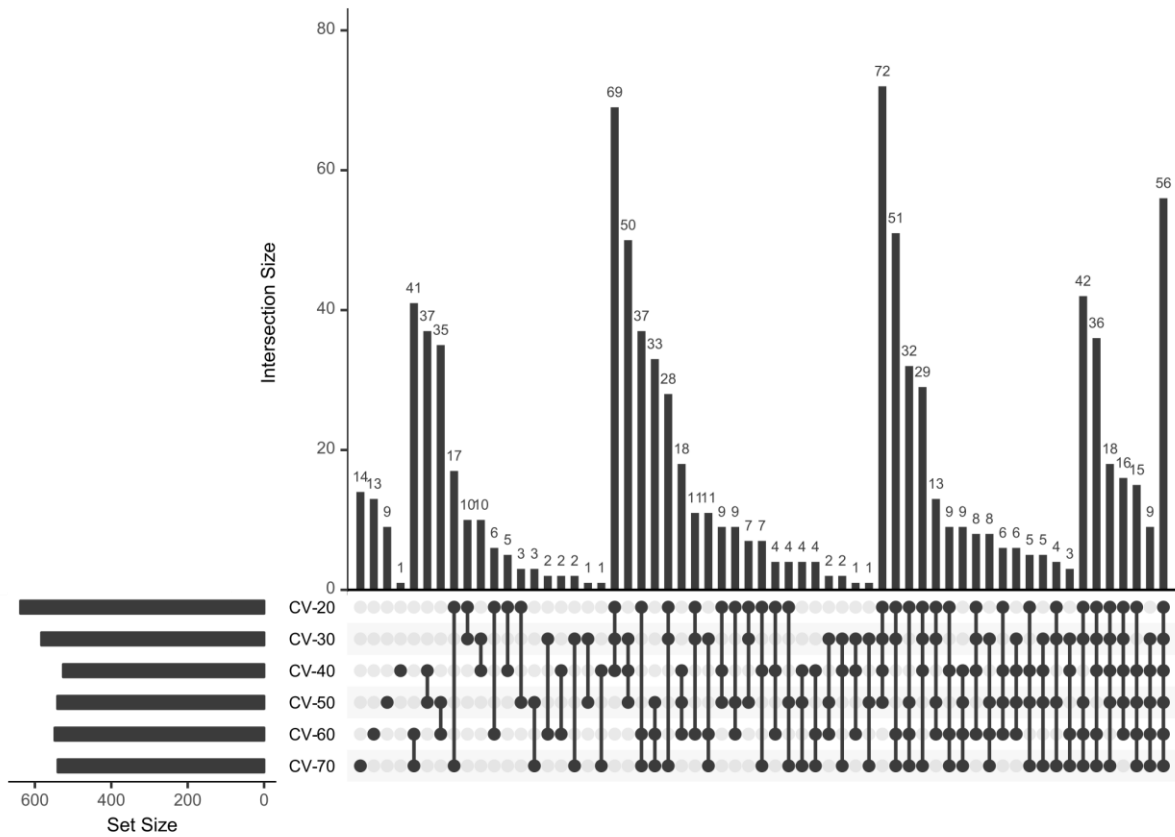

Figure S2 – UpSet plot showing set intersections of the filtered Xtract results for intact proteins across the testes image and all compensation field values. The histogram shows the number of intact proteins belonging to the set. The sets are shown below the histogram and are ordered according to the degree of the set overlap.



Figure S4 UpSet plot for brain

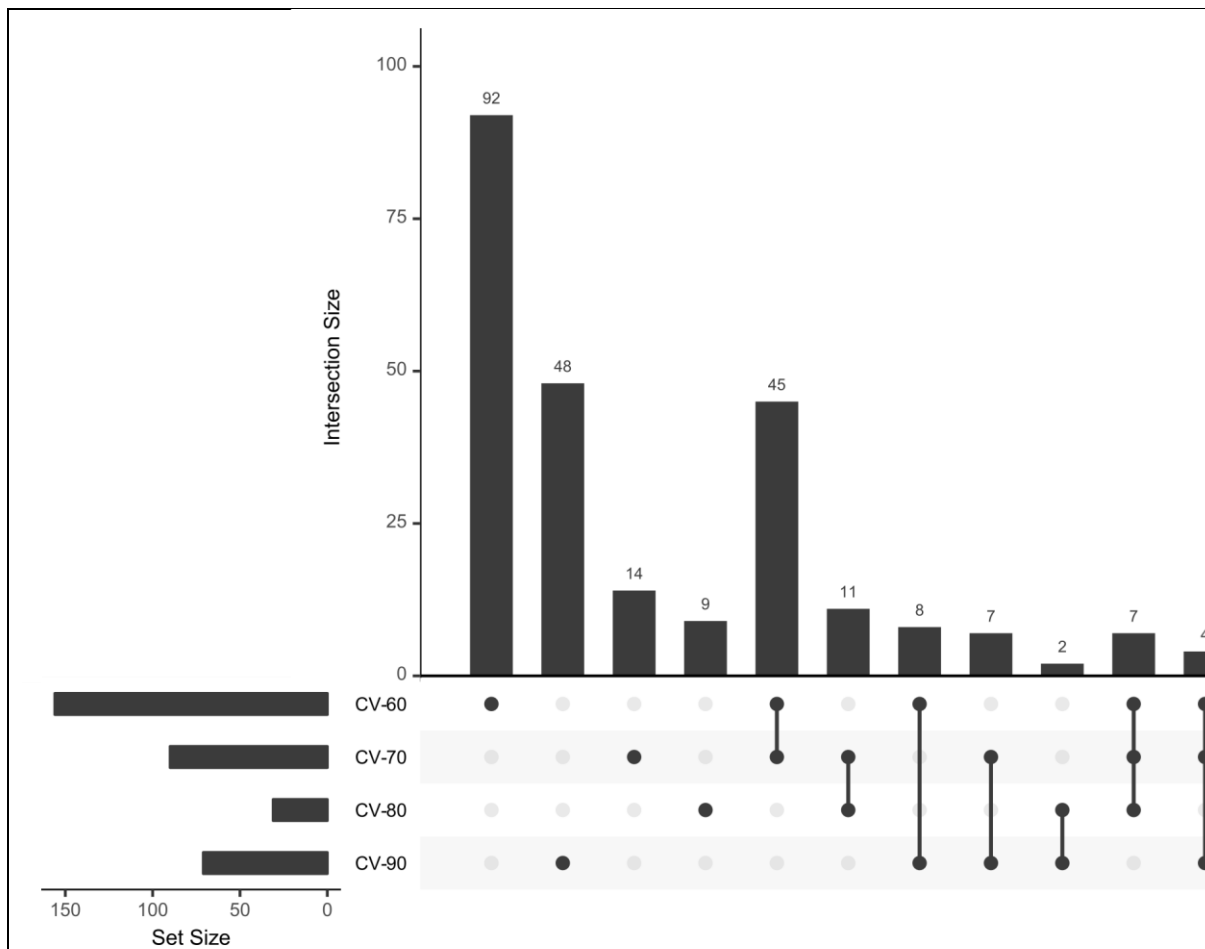

Figure S4 – UpSet plot showing set intersections of the filtered Xtract results for intact proteins across the brain image and all compensation field values. The histogram shows the number of intact proteins belonging to the set. The sets are shown below the histogram and are ordered according to the degree of the set overlap.

**Figure S5 - LESA FAIMS EThCD MS/MS of ions with m/z 661 (14+, 9242.00 Da) detected in kidney (CV = -50 V), assigned as high mobility group nucleosomal binding domain 2 (Q4KLJ0).**

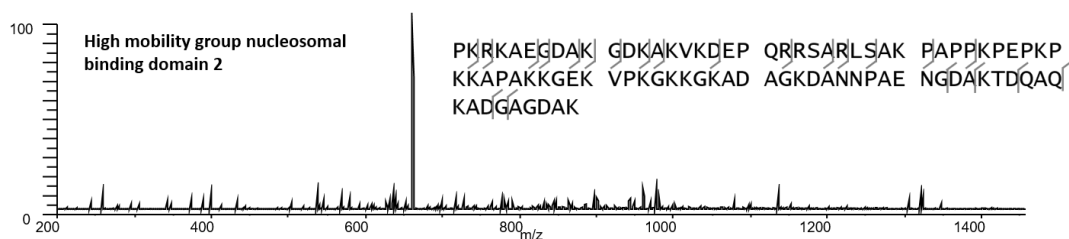

**Table S1 - Fragment ion assignments for high mobility group nucleosomal binding domain 2 (precursor m/z 661; 14+)**

| m/z expt | m/z calc | ppm error | z | assignment |
|----------|----------|-----------|---|------------|
| 226.1548 | 226.1550 | -0.9      | 1 | b2         |
| 243.1814 | 243.1816 | -0.8      | 1 | c2         |
| 399.2824 | 399.2827 | -0.8      | 1 | c3         |
| 445.2164 | 445.2167 | -0.7      | 1 | z5         |
| 485.7748 | 485.7751 | -0.6      | 2 | c9         |
| 502.2377 | 502.2382 | 1.0       | 1 | z6         |
| 549.8221 | 549.8225 | -0.7      | 2 | c10        |
| 572.279  | 572.2794 | -0.7      | 2 | z12        |
| 578.3329 | 578.3333 | -0.7      | 2 | c11        |
| 684.1907 | 684.192  | -1.9      | 5 | c31        |
| 699.8937 | 699.8942 | -0.7      | 2 | c13        |
| 727.4569 | 727.4573 | -0.5      | 1 | c6         |
| 730.9122 | 730.9130 | -1.1      | 4 | c26        |
| 735.4119 | 735.4128 | -1.2      | 1 | c14        |
| 737.2203 | 737.2205 | -0.3      | 5 | c34        |
| 744.3639 | 744.3642 | -0.4      | 2 | z15        |
| 784.4782 | 784.4788 | -0.8      | 1 | c7         |
| 780.941  | 780.942  | -1.3      | 4 | c28        |
| 816.3971 | 816.3972 | -0.1      | 1 | z9         |
| 817.4572 | 817.4577 | -0.6      | 3 | c22        |
| 837.3957 | 837.3962 | -0.6      | 2 | z17        |
| 845.405  | 845.4056 | -0.7      | 2 | y17        |
| 922.1802 | 922.1811 | -1.0      | 3 | c25        |
| 970.5543 | 970.5554 | -1.1      | 2 | c18        |

**Figure S6 – LESA FAIMS EThCD MS/MS of ions detected in testes: A) m/z 706 (7+, 4933.53 Da) (CV = -70 V); B) m/z 558 (5+, 2788.48 Da) (CV = -70 V); C) m/z 1036 (20+, 20698.49 Da) (CV = -30 V).**

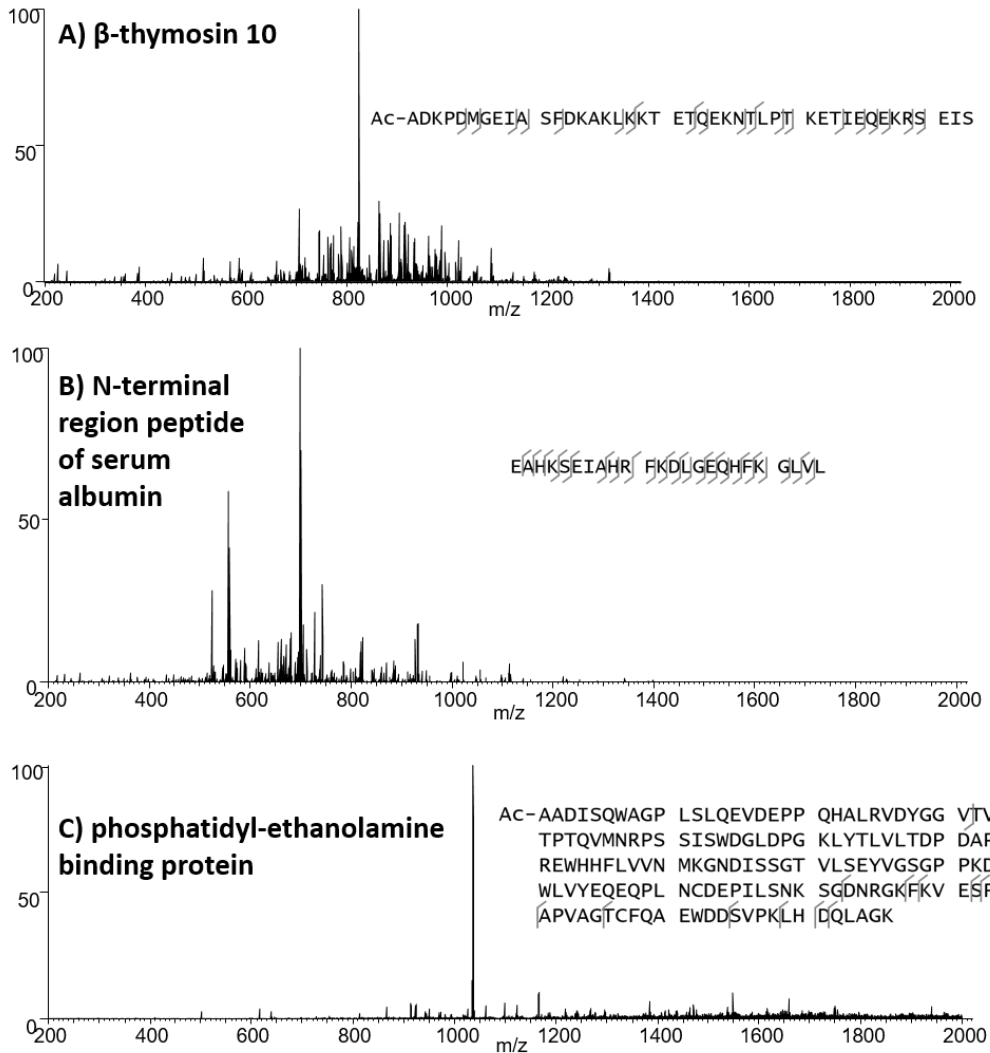



**Table S2 - Fragment ion assignments for  $\beta$ -thymosin 10 (precursor m/z 706; 7+)**

| m/z expt  | m/z calc  | ppm error | z | assignment |
|-----------|-----------|-----------|---|------------|
| 500.2259  | 500.2262  | -0.6      | 2 | b9         |
| 535.7450  | 535.7448  | 0.4       | 2 | b10        |
| 569.2566  | 569.2566  | 0.0       | 1 | b5         |
| 586.2834  | 586.2831  | 0.5       | 1 | c5         |
| 592.311   | 592.3109  | 0.2       | 3 | y15        |
| 645.0156  | 645.0153  | 0.5       | 6 | y33        |
| 656.8552  | 656.8548  | 0.6       | 6 | y34        |
| 660.3438  | 660.3437  | 0.2       | 2 | y11        |
| 663.3435  | 663.3434  | 0.2       | 3 | b18        |
| 669.0187  | 669.0189  | -0.3      | 3 | c18        |
| 675.7019  | 675.7021  | -0.3      | 6 | y35        |
| 717.3235  | 717.3236  | -0.1      | 1 | c6         |
| 724.8651  | 724.865   | 0.1       | 2 | y12        |
| 741.6345  | 741.634   | 0.7       | 4 | c26        |
| 744.4007  | 744.4008  | -0.1      | 3 | y19        |
| 756.4114  | 756.4105  | 1.2       | 5 | y32        |
| 766.8958  | 766.8959  | -0.1      | 4 | c27        |
| 773.8164  | 773.8169  | -0.6      | 5 | y33        |
| 788.0242  | 788.0243  | -0.1      | 5 | y34        |
| 790.9107  | 790.9103  | 0.5       | 4 | b28        |
| 801.088   | 801.0882  | -0.2      | 6 | a42        |
| 810.6414  | 810.6411  | 0.4       | 5 | y35        |
| 819.42997 | 819.4301  | -0.2      | 4 | c29        |
| 822.0965  | 822.0966  | -0.1      | 3 | c22        |
| 833.0451  | 833.0443  | 1.0       | 5 | y36        |
| 839.4363  | 839.4363  | 0.0       | 2 | y14        |
| 844.6922  | 844.6921  | 0.1       | 4 | c30        |
| 864.783   | 864.7828  | 0.2       | 3 | c23        |
| 886.3612  | 886.3611  | 0.1       | 1 | b8         |
| 887.9626  | 887.9627  | -0.1      | 2 | y15        |
| 904.2769  | 904.2769  | 0.0       | 5 | c39        |
| 921.6834  | 921.6833  | 0.1       | 5 | c40        |
| 934.2391  | 934.2384  | 0.7       | 4 | c33        |
| 936.4952  | 936.4954  | -0.2      | 2 | z16        |
| 938.9775  | 938.9773  | 0.2       | 2 | c17        |
| 977.8398  | 977.8392  | 0.6       | 3 | z25        |
| 994.7706  | 994.77    | 0.6       | 4 | c35        |
| 1003.025  | 1003.0248 | 0.2       | 2 | c18        |
| 999.4452  | 999.4452  | 0.0       | 1 | b9         |
| 1016.4715 | 1016.4717 | -0.2      | 1 | c9         |
| 1022.1918 | 1022.1922 | -0.4      | 3 | c27        |
| 1026.7838 | 1026.7847 | -0.9      | 4 | c36        |
| 1052.0499 | 1052.05   | -0.1      | 2 | y18        |

|           |           |       |   |     |
|-----------|-----------|-------|---|-----|
| 1054.211  | 1054.2113 | -0.3  | 3 | b28 |
| 1059.0462 | 1059.0453 | 0.8   | 4 | c37 |
| 1087.5086 | 1087.5088 | -0.2  | 1 | c10 |
| 1091.0682 | 1091.0691 | -0.8  | 4 | c39 |
| 1125.9193 | 1125.9203 | -0.9  | 3 | c30 |
| 1223.8851 | 1223.8854 | -0.29 | 4 | y43 |
| 1232.6406 | 1232.6412 | -0.5  | 2 | c22 |
| 1236.6397 | 1236.6387 | 0.8   | 2 | z21 |
| 1321.6091 | 1321.6093 | -0.2  | 1 | c12 |

**Table S3 - Fragment ion assignments for N-terminal region peptide of serum albumin (precursor m/z 558; 5+)**

| m/z expt | m/z calc | ppm error | z | assignment |
|----------|----------|-----------|---|------------|
| 231.1702 | 231.1703 | -0.4      | 1 | y2         |
| 466.2408 | 466.2409 | -0.2      | 1 | b4         |
| 471.282  | 471.2820 | 0.0       | 2 | y8         |
| 472.9211 | 472.9213 | -0.4      | 3 | b12 -H2O   |
| 483.2673 | 483.2674 | -0.2      | 1 | c4         |
| 490.5008 | 490.5012 | -0.8      | 4 | b17 -H2O   |
| 518.6866 | 518.6868 | -0.4      | 5 | y22        |
| 524.7658 | 524.7660 | -0.4      | 4 | b18 - H2O  |
| 526.885  | 526.8848 | 0.4       | 5 | a23        |
| 528.8815 | 528.8817 | -0.4      | 5 | b23 - H2O  |
| 548.9582 | 548.9584 | -0.4      | 3 | b14 - H2O  |
| 555.1006 | 555.1006 | 0.0       | 5 | M- H2O     |
| 570.2994 | 570.2994 | 0.0       | 1 | c5         |
| 579.6444 | 579.6445 | -0.2      | 3 | c15        |
| 588.8152 | 588.8153 | -0.2      | 2 | c10        |
| 602.3161 | 602.3161 | 0.0       | 4 | c20        |
| 610.9796 | 610.9797 | -0.2      | 3 | b16 - H2O  |
| 613.8422 | 613.8419 | 0.5       | 4 | y21        |
| 620.8558 | 620.8561 | -0.5      | 2 | y11        |
| 622.6588 | 622.6587 | 0.2       | 3 | c16        |
| 633.587  | 633.5871 | -0.2      | 4 | a22        |
| 636.0833 | 636.0832 | 0.2       | 4 | b22 - H2O  |
| 640.5859 | 640.5858 | 0.2       | 4 | b22        |
| 642.0231 | 642.0232 | -0.2      | 3 | y15        |
| 648.1067 | 648.1067 | 0.0       | 4 | y22        |
| 660.8501 | 660.8503 | -0.3      | 4 | b23 - H2O  |
| 662.3496 | 662.3495 | 0.2       | 2 | c11        |
| 665.3534 | 665.3529 | 0.8       | 4 | b22        |
| 669.6094 | 669.6096 | -0.3      | 4 | c23        |
| 676.4392 | 676.4392 | 0.0       | 1 | y6         |
| 678.3689 | 678.3695 | -0.9      | 2 | y12        |
| 711.0312 | 711.0312 | 0.0       | 3 | c18        |
| 726.397  | 726.3969 | 0.1       | 2 | c12        |
| 748.3752 | 748.375  | 0.3       | 3 | b19 - H2O  |
| 760.0539 | 760.0540 | -0.1      | 3 | c19        |
| 770.0818 | 770.0823 | -0.6      | 3 | z20        |
| 775.3973 | 775.3971 | 0.3       | 2 | b13        |
| 783.9101 | 783.9104 | -0.4      | 2 | c13        |
| 791.0732 | 791.0733 | -0.1      | 3 | b20 - H2O  |
| 802.7519 | 802.7524 | -0.6      | 3 | c20        |
| 807.9415 | 807.9419 | -0.5      | 2 | z14        |
| 810.0807 | 810.0805 | 0.2       | 3 | b21        |

|           |           |      |   |           |
|-----------|-----------|------|---|-----------|
| 815.9515  | 815.9512  | 0.4  | 2 | y14       |
| 818.1202  | 818.1202  | 0.0  | 3 | y21       |
| 821.7596  | 821.7595  | 0.1  | 3 | c21       |
| 840.4522  | 840.4524  | -0.2 | 2 | c14       |
| 847.7754  | 847.7752  | 0.2  | 3 | b22 - H2O |
| 853.7779  | 853.7787  | -0.9 | 3 | b22       |
| 858.4662  | 858.4669  | -0.8 | 3 | z22       |
| 863.8064  | 863.8065  | -0.1 | 3 | y22       |
| 868.9634  | 868.9632  | 0.2  | 2 | c15       |
| 882.1461  | 882.1459  | 0.2  | 3 | z23       |
| 883.4630  | 883.4632  | -0.2 | 2 | c8        |
| 885.9921  | 885.9924  | -0.3 | 2 | z16       |
| 892.4778  | 892.477   | 0.9  | 3 | c23       |
| 933.4845  | 933.4845  | 0.0  | 2 | c16       |
| 975.5015  | 975.5007  | 0.8  | 1 | a9        |
| 997.5134  | 997.5138  | -0.4 | 2 | c17       |
| 1020.5216 | 1020.5221 | -0.5 | 1 | c9        |
| 1054.5802 | 1054.5806 | -0.4 | 1 | z9        |
| 1066.0434 | 1066.0432 | 0.2  | 2 | c18       |
| 1111.1039 | 1111.1037 | 0.2  | 2 | z19       |
| 1218.6666 | 1218.6672 | -0.5 | 2 | z21       |

**Table S4 - Fragment ion assignments for phosphatidyl-ethanolamine binding protein (precursor m/z 1036; 20+)**

| m/z expt  | m/z calc  | ppm error | z | assignment |
|-----------|-----------|-----------|---|------------|
| 500.2951  | 500.2953  | -0.4      | 1 | z5         |
| 615.3219  | 615.3222  | -0.5      | 1 | z6         |
| 638.8600  | 638.8603  | -0.5      | 1 | z12        |
| 865.4649  | 865.4652  | -0.3      | 1 | z8         |
| 913.2161  | 913.2169  | -0.9      | 4 | z33        |
| 923.1126  | 923.1139  | -1.4      | 3 | z26        |
| 942.1199  | 942.1210  | -1.2      | 3 | z27        |
| 949.9829  | 949.9840  | -1.2      | 4 | z34        |
| 971.7410  | 971.7420  | -1.0      | 4 | z35        |
| 992.3059  | 992.3074  | -1.5      | 5 | z44        |
| 1025.5014 | 1025.5020 | -0.6      | 3 | z29        |
| 1060.7931 | 1060.7935 | -0.4      | 4 | z38        |
| 1097.5606 | 1097.5606 | 0.0       | 4 | z39        |
| 1120.5565 | 1120.5600 | -3.1      | 3 | c31        |
| 1122.5541 | 1122.5548 | -0.6      | 3 | z31        |
| 1165.2520 | 1165.2531 | -0.9      | 3 | z32        |
| 1186.5577 | 1186.5587 | -0.8      | 2 | z21        |
| 1384.1646 | 1384.1671 | -1.8      | 2 | z26        |
| 1747.3749 | 1747.3760 | -0.6      | 2 | z32        |
